# Supplementary material for: Effect of carbon types on the generation and morphology of GaN polycrystals grown using the Na flux method
Source: Royal Society of Chemistry journal article supplement (doi:10.1039/c4ce01899k), 2014-11-26
Supplement: c4ce01899k1.pdf [file c4ce01899k1.pdf]

Electronic supplementary information

## Effect of carbon types on generation and morphology of GaN polycrystals in Na flux method

Zongliang Liu,<sup>a</sup> Guoqiang Ren,<sup>\*ab</sup> Lin Shi,<sup>a</sup> Xujun Su,<sup>a</sup> Jianfeng Wang<sup>ab</sup> and Ke Xu<sup>\*ab</sup>

<sup>a</sup> Suzhou Institute of Nano-tech and Nano-bionics, Chinese Academy of Science, Suzhou 215123, People's Republic of China.

E-mail: [gqren2008@sinano.ac.cn](mailto:gqren2008@sinano.ac.cn); Fax: +86-512-62872564; Tel: +86-512-69561967

E-mail: [kxu2006@sinano.ac.cn](mailto:kxu2006@sinano.ac.cn); Fax: +86-512-62872564; Tel: +86-512-62872501;

<sup>b</sup> Suzhou Nanowin Science and Technology Co., Ltd., Suzhou 215123, People's Republic of China

### 1. Transmission Electron Microscopy

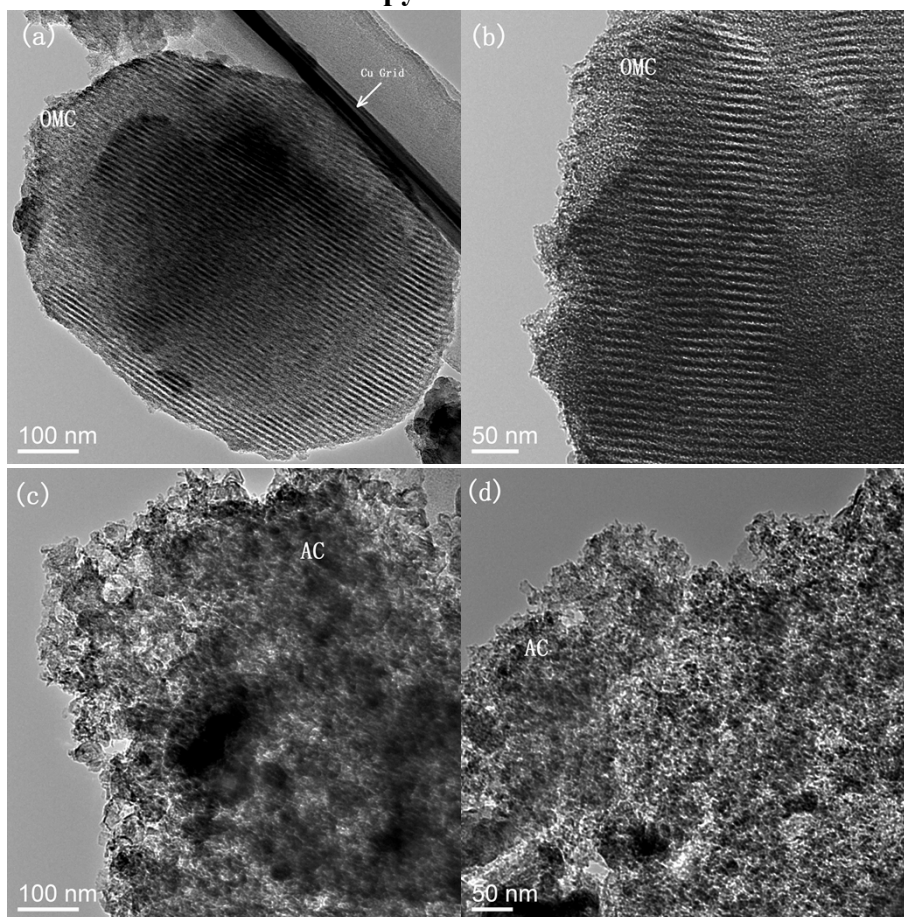

**Fig. S1** The TEM images of (a, b) ordered mesoporous carbon (OMC), viewing along the [110] direction, long-range stripe-like periodic arrangement of mesoporous structure is clearly visible; and (c, d) activated carbon (AC), random arrangement of amorphous structure is visible.
